# Supplementary material for: Implementation of a stratified approach and gene immobilization to enhance the osseointegration of a silk-based ligament graft
Source: Royal Society of Chemistry journal article supplement (doi:10.1039/c7tb01579h), 2017-01-01
Supplement: c7tb01579h1.pdf [file c7tb01579h1.pdf]

## **Implementation of stratified approach and gene immobilization to enhance the osseointegration of silk-based ligament graft**

Jiabin Fan<sup>1#</sup>, Ligu Sun<sup>2,3#</sup>, Xiaonan Chen<sup>4#</sup>, Ling Qu<sup>5</sup>, Hongguo Li<sup>2</sup>, Xincheng Liu<sup>2</sup>, Yushen Zhang<sup>2</sup>, Pengzhen Cheng<sup>2</sup>, Hongbin Fan<sup>2\*</sup>

<sup>1</sup>Division of Advanced Prosthodontics, School of Dentistry, University of California, Los Angeles, California 90095, United States of America

<sup>2</sup>Institute of Orthopedic Surgery, Xi-Jing Hospital, The Fourth Military Medical University, Xi'an 710032, China

<sup>3</sup>Tianjin Sanatorium, Beijing Military Region, Tianjin 300000, China

<sup>4</sup>Department of Health Statistics, The Fourth Military Medical University, Xi'an 710032, China

<sup>5</sup>Department of Clinical Laboratory, Xi-Jing Hospital, The Fourth Military Medical University, Xi'an 710032, China

#These authors contributed equally to this work and should be considered as co-first authors.

### **\* Correspondence to:**

Hongbin Fan, MD, PhD,

Department of Orthopaedic Surgery,

Xi-Jing Hospital, the Fourth Military Medical University,

West Chang-le Road, Xi'an, China 710032

E-mail: fanhb@fmmu.edu.cn

Tel: 86-29-84775284

Fax: 86-29-84771064

A

|   |     | Rp[μm] | Rv[μm] | Rz[μm] | Rc[μm] | Rt[μm]  | Ra[μm] | Rq[μm] | Rsk    | Rku   | Rsm[μm] | RΔq[°]  | RΔc[μm] |
|---|-----|--------|--------|--------|--------|---------|--------|--------|--------|-------|---------|---------|---------|
| ✓ | 1   | 48.537 | 41.106 | 89.643 | 53.532 | 256.683 | 15.709 | 20.490 | 0.338  | 3.826 | 22.051  | 373.537 | 27.246  |
| ✓ | 2   | 40.812 | 40.826 | 81.638 | 49.879 | 199.290 | 14.563 | 18.980 | -0.045 | 3.694 | 26.354  | 359.741 | 26.483  |
| ✓ | 3   | 49.889 | 40.290 | 90.179 | 67.152 | 403.290 | 14.924 | 20.290 | 0.194  | 4.361 | 31.276  | 376.715 | 25.736  |
| ✓ | 4   | 41.328 | 35.645 | 76.974 | 47.050 | 313.896 | 13.455 | 17.888 | 0.162  | 3.941 | 27.422  | 342.252 | 22.416  |
| ✓ | 5   | 39.332 | 38.759 | 78.091 | 41.873 | 236.525 | 12.566 | 16.927 | -0.018 | 4.679 | 25.977  | 316.822 | 20.681  |
| ✓ | 6   | 29.621 | 24.279 | 53.900 | 34.720 | 123.967 | 10.123 | 12.901 | 0.256  | 3.138 | 22.806  | 241.480 | 18.947  |
| ✓ | 7   | 23.709 | 25.396 | 49.105 | 31.865 | 187.611 | 7.515  | 10.306 | -0.024 | 4.463 | 25.855  | 226.858 | 13.219  |
| ✓ | 8   | 31.054 | 29.339 | 60.392 | 37.419 | 173.853 | 11.230 | 14.448 | 0.209  | 3.449 | 24.421  | 272.077 | 17.810  |
| ✓ | 9   | 22.169 | 22.178 | 44.347 | 29.594 | 133.927 | 7.143  | 9.689  | 0.043  | 4.296 | 25.228  | 202.492 | 12.053  |
| ✓ | 10  | 39.436 | 32.224 | 71.661 | 45.215 | 399.297 | 11.785 | 15.973 | 0.074  | 3.949 | 28.646  | 296.964 | 14.356  |
|   |     | 10     | 10     | 10     | 10     | 10      | 10     | 10     | 10     | 10    | 10      | 10      | 10      |
|   | AVG | 36.589 | 33.004 | 69.593 | 43.830 | 242.834 | 11.901 | 15.789 | 0.119  | 3.980 | 26.004  | 300.894 | 19.895  |
|   | MIN | 22.169 | 22.178 | 44.347 | 29.594 | 123.967 | 7.143  | 9.689  | -0.045 | 3.138 | 22.051  | 202.492 | 12.053  |
|   | MAX | 49.889 | 41.106 | 90.179 | 67.152 | 403.290 | 15.709 | 20.490 | 0.338  | 4.679 | 31.276  | 376.715 | 27.246  |
|   | σ   | 9.595  | 7.343  | 16.633 | 11.356 | 100.666 | 2.964  | 3.883  | 0.132  | 0.479 | 2.706   | 63.240  | 5.583   |
|   | 3σ  | 28.785 | 22.029 | 49.899 | 34.069 | 301.997 | 8.893  | 11.649 | 0.395  | 1.437 | 8.117   | 189.719 | 16.749  |

B

|   |     | Rp[μm]  | Rv[μm]  | Rz[μm]  | Rc[μm]  | Rt[μm]  | Ra[μm] | Rq[μm] | Rsk    | Rku   | Rsm[μm] | RΔq[°]  | RΔc[μm] |
|---|-----|---------|---------|---------|---------|---------|--------|--------|--------|-------|---------|---------|---------|
| ✓ | 1   | 76.912  | 91.333  | 168.245 | 112.454 | 544.136 | 27.881 | 37.370 | -0.054 | 4.542 | 28.685  | 737.063 | 46.735  |
| ✓ | 2   | 86.966  | 77.365  | 164.332 | 102.896 | 630.473 | 26.211 | 35.370 | 0.266  | 4.562 | 25.573  | 712.251 | 44.540  |
| ✓ | 3   | 91.999  | 106.385 | 198.385 | 125.334 | 510.872 | 38.237 | 48.214 | -0.218 | 3.709 | 27.977  | 882.001 | 70.046  |
| ✓ | 4   | 101.160 | 109.209 | 210.369 | 132.953 | 572.271 | 38.959 | 50.161 | 0.051  | 3.952 | 25.788  | 977.717 | 62.497  |
| ✓ | 5   | 87.918  | 90.009  | 177.928 | 113.682 | 565.725 | 31.763 | 40.634 | -0.030 | 3.825 | 28.438  | 771.357 | 56.063  |
| ✓ | 6   | 86.539  | 97.462  | 184.001 | 113.762 | 666.083 | 31.487 | 41.610 | -0.126 | 4.283 | 26.458  | 831.362 | 56.499  |
| ✓ | 7   | 92.886  | 103.168 | 196.055 | 117.028 | 582.867 | 32.351 | 43.565 | -0.053 | 4.146 | 27.773  | 843.626 | 56.366  |
| ✓ | 8   | 96.397  | 108.014 | 204.410 | 135.104 | 489.661 | 38.227 | 49.456 | -0.086 | 3.538 | 32.344  | 894.598 | 63.272  |
| ✓ | 9   | 87.786  | 100.415 | 188.201 | 116.371 | 476.227 | 34.314 | 43.481 | -0.228 | 3.976 | 27.125  | 865.176 | 62.175  |
| ✓ | 10  | 61.705  | 61.808  | 123.513 | 64.727  | 290.724 | 19.879 | 26.811 | 0.033  | 3.984 | 23.991  | 542.884 | 34.701  |
|   |     | 10      | 10      | 10      | 10      | 10      | 10     | 10     | 10     | 10    | 10      | 10      | 10      |
|   | AVG | 87.027  | 94.517  | 181.544 | 113.431 | 532.904 | 31.931 | 41.667 | -0.045 | 4.052 | 27.415  | 805.804 | 55.289  |
|   | MIN | 61.705  | 61.808  | 123.513 | 64.727  | 290.724 | 19.879 | 26.811 | -0.228 | 3.538 | 23.991  | 542.884 | 34.701  |
|   | MAX | 101.160 | 109.209 | 210.369 | 135.104 | 666.083 | 38.959 | 50.161 | 0.266  | 4.562 | 32.344  | 977.717 | 70.046  |
|   | σ   | 11.014  | 15.099  | 25.281  | 19.715  | 103.669 | 6.048  | 7.168  | 0.143  | 0.336 | 2.265   | 121.401 | 10.523  |
|   | 3σ  | 33.041  | 45.296  | 75.842  | 59.146  | 311.006 | 18.145 | 21.505 | 0.429  | 1.008 | 6.794   | 364.204 | 31.570  |

**Figure S1:** Analysis of representative “Ra” parameter for roughness of silk-based scaffold with ligament (A) and bone (B) regions.

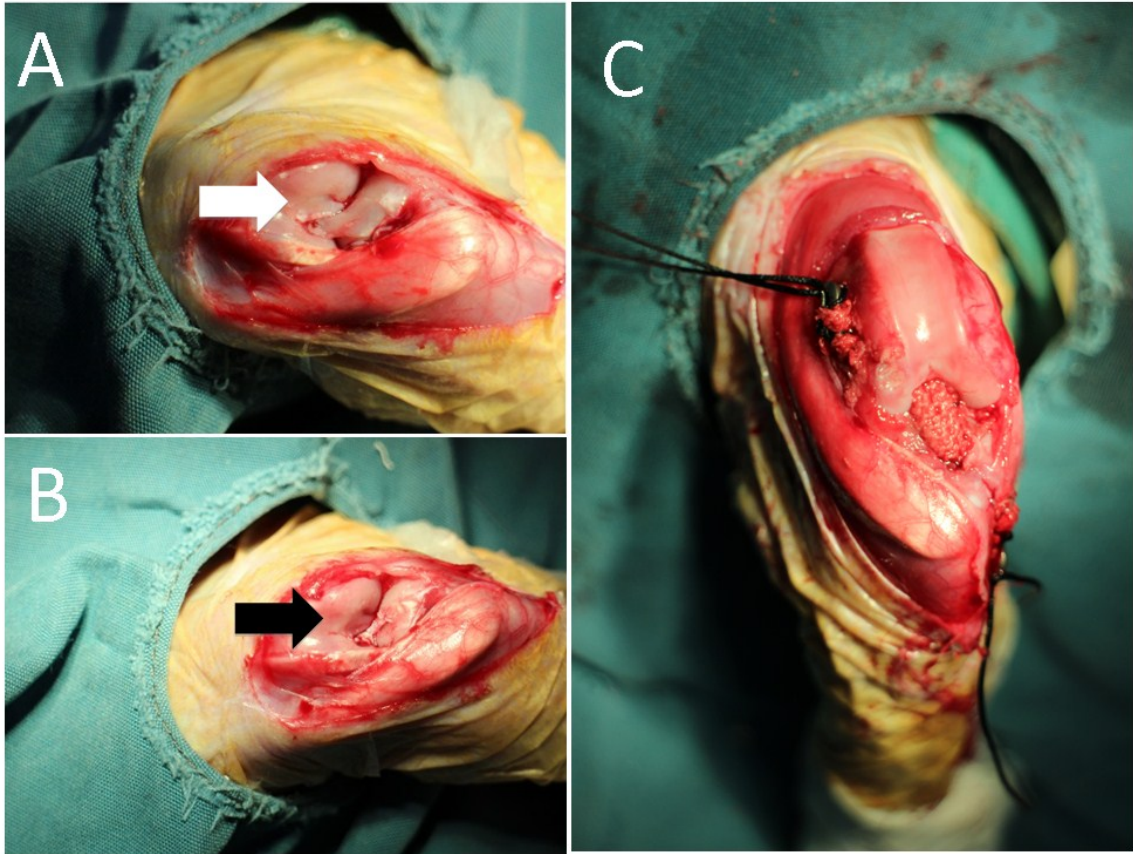

**Figure S2:** The silk-based graft implanted into rabbit ACL-defect model. (A) The rabbit ACL was exposed after opening the knee joint cavity (White arrow indicates ACL); (B) the removed ACL was prepped for graft implantation (Black arrow indicates the removed ACL). (C) Silk-based graft was placed on the ACL-defect with fixation to bone tunnels positioned within femur and tibia.

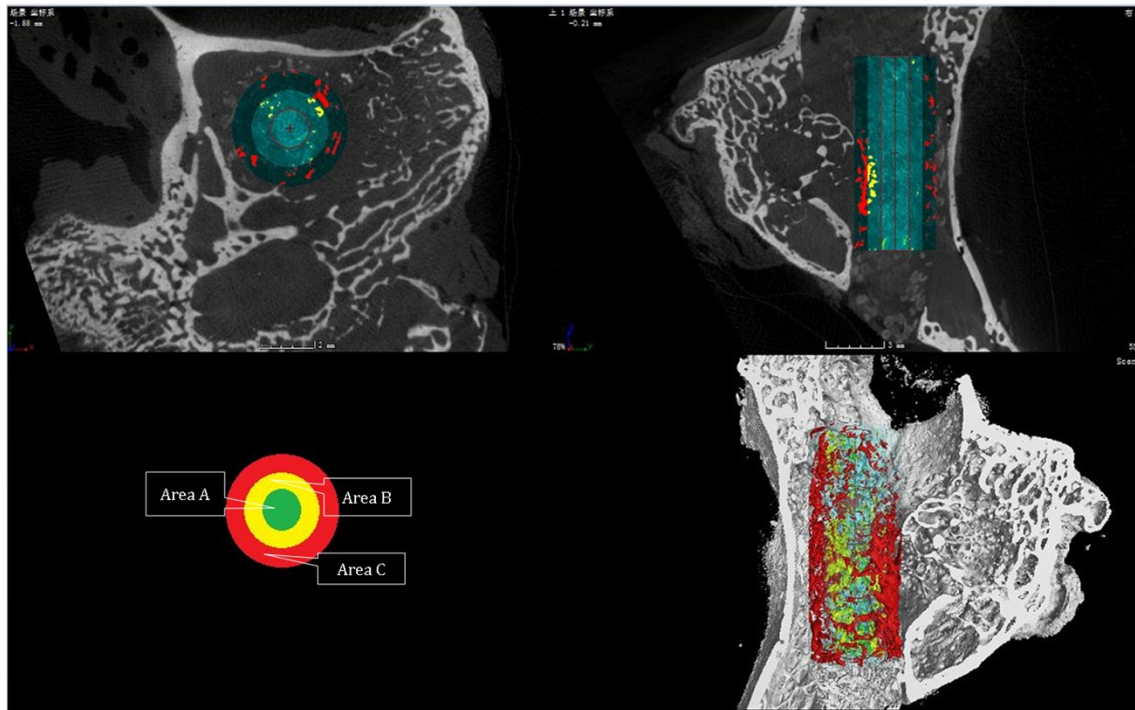

**Figure S3:** Three-dimensional construction image of microCT scan for evaluating osseointegration regeneration of silk-based graft *in vivo*.

**Table S1:** Primer sequences for real-time PCR assay.

| Genes             | Primer (Forward)            | Primer (Reverse)       |
|-------------------|-----------------------------|------------------------|
| <i>COL1A2</i>     | GCATGTCTGGTTAGGAGAAACC      | ATGTATGCAATGCTGTTCTTGC |
| <i>COL2A1</i>     | AAGAGCGGTGACTACTGGATAG      | TGCTGTCTCCATAGCTGAAGT  |
| <i>Tenascin-C</i> | TCTCTGCACATAGTGAAAAACAATACC | TCAAGGCAGTGGTGTCTGTGA  |
| <i>Runx2</i>      | CCTTCCACTCTCAGTAAGAAGA      | CCTTCCACTCTCAGTAAGAAGA |
| <i>Sox9</i>       | CTTCATGAAGATGACCGACGAG      | CTCTTCGCTCTCCTTCTTGAGG |
| <i>TGF-β3</i>     | TGGCTGTTGAGAAGAGAGTCC       | TGCTTCAGGGTTCAGAGTGTT  |
| <i>BMP2</i>       | CGCAGCTTCATCACGAAG          | GTGGTCCACCGCATCACAG    |
| <i>GAPDH</i>      | GACATCAAGAAGGTGGTGAAGC      | CTTCACAAAGTGGTCATTGAGG |

**Table S2:** Mechanics property of silk scaffold (n=6,  $\bar{x} \pm s$ , \*P<0.05).

| Sample     | Maximum tensile load (N) | Stiffness (N/mm) | Maximum tensile displacement (mm) |
|------------|--------------------------|------------------|-----------------------------------|
| Rabbit ACL | 131.82±17.64             | 47.07±14.84      | 3.01±1.03                         |
| Silk graft | 169.11±9.75*             | 65.46±8.90*      | 2.87±0.56                         |

**Table S3:** Maximum pullout force examined for silk-based graft (Femur and Tibia sides) derived from Rabbit (n=6,  $\bar{x} \pm s$ ).

| Group     | 4W (N)     | 8W (N)      | 12W (N)    |
|-----------|------------|-------------|------------|
| Femur (E) | 14.38±3.27 | 20.45±4.78  | 41.95±8.87 |
| Femur (C) | 5.64±4.98  | 16.57±6.31  | 26.81±6.19 |
| Tibia (E) | 13.20±4.96 | 25.72±11.76 | 41.18±8.85 |
| Tibia (C) | 7.23±4.50  | 15.04±5.08  | 27.54±5.63 |

E, Experimental group; C, Control group.
